# Supplementary material
Source: Research Square preprint supplement (doi:10.21203/rs.3.rs-9336893/v1)
Supplement: Supplementary file 1 [file 209598fd3f21d10ca5c8d38a.docx]

**Table 3**. Antibiotic Resistance by Pathogen and Year

| **Microorganism** | **Antibiotic** | **2019** | | **2020** | | | **2021** | | **2022** | | **2023** | | **2024** | |
| --- | --- | --- | --- | --- | --- | --- | --- | --- | --- | --- | --- | --- | --- | --- |
|  |  | **S** | **R** | **S** | **R** | **S** | | **R** | **S** | **R** | **S** | **R** | **S** | **R** |
| S. aureus | *Cephalothin* | 7 | 0 | 7 | 1 | 8 | | 0 | 7 | 4 | 7 | 2 | 9 | 1 |
|  | *Rifampicin* | 7 | 0 | 8 | 0 | 8 | | 0 | 11 | 0 | 7 | 2 | 8 | 2 |
|  | *Vancomycin* | 7 | 0 | 8 | 0 | 8 | | 0 | 11 | 0 | 9 | 0 | 10 | 0 |
|  | *Gentamicin* | 2 | 5 | 8 | 0 | 8 | | 0 | 7 | 4 | 9 | 0 | 7 | 3 |
| Coagulase-negative Staphylococci | *Cephalothin* | 10 | 6 | 6 | 9 | 10 | | 9 | 7 | 15 | 9 | 8 | 3 | 9 |
|  | *rifampicin* | 12 | 4 | 13 | 2 | 19 | | 0 | 11 | 11 | 16 | 1 | 8 | 4 |
|  | *vancomycin* | 12 | 4 | 14 | 1 | 19 | | 0 | 19 | 3 | 17 | 0 | 12 | 0 |
|  | *Methicillin* | 10 | 6 | 7 | 8 | 12 | | 7 | 9 | 13 | 8 | 9 | 5 | 7 |
|  | *Gentamicin* | 13 | 3 | 6 | 9 | 16 | | 3 | 7 | 15 | 17 | 0 | 7 | 5 |
| Streptococcus | *Penicillin G* | 0 | 1 | 4 | 1 | 0 | | 0 | 3 | 0 | 4 | 0 | 3 | 1 |
| Enterococcus | *Ampicillin* | 0 | 2 | 2 | 0 | 0 | | 2 | 2 | 14 | 6 | 0 | 1 | 5 |
|  | *Vancomycin* | 0 | 2 | 0 | 2 | 2 | | 0 | 13 | 3 | 6 | 0 | 2 | 4 |
|  | *Linezolid* | 2 | 0 | 2 | 0 | 2 | | 0 | 16 | 0 | 6 | 0 | 6 | 0 |
|  | *Tigecycline* | 2 | 0 | 2 | 0 | 2 | | 0 | 16 | 0 | 6 | 0 | 6 | 0 |
| Gram negative | *PTZ* | 10 | 6 | 19 | 3 | 19 | | 2 | 14 | 2 | 15 | 1 | 11 | 6 |
|  | *Ciprofloxacin* | 12 | 4 | 20 | 2 | 16 | | 5 | 10 | 6 | 16 | 0 | 9 | 8 |
|  | *Meropenem* | 15 | 1 | 22 | 0 | 18 | | 3 | 15 | 1 | 16 | 0 | 15 | 2 |
|  | *Amikacin* | 15 | 1 | 18 | 4 | 18 | | 3 | 16 | 0 | 16 | 0 | 15 | 2 |
|  | *Gentamicin* | 8 | 8 | 22 | 0 | 18 | | 3 | 11 | 5 | 14 | 2 | 15 | 2 |

Values represent number of sensitive (S) and resistant (R) isolates tested each year
